# Supplementary material for: Association Between Palliative Care in the Emergency Department and Cardiopulmonary Resuscitation Decisions in Patients with Poor Prognosis: A Retrospective Observational Study
Source: Research Square preprint supplement (doi:10.21203/rs.3.rs-6622782/v1), 2025-06-09
Supplement: Supplementary file 1 [file 47d25293c32db150dc2621ce.xlsx]

## Sheet: Planilha1
Variable		No CP (4.444)	CP (1.767)	P
Age group	40-49	1247(28.6)	198(11.2)	<0.01
	50-59	794(17.9)	266(15.0)
	60-69	1040(23.4)	443(25.0)
	70-79	889(20.0)	438(24.8)
	>80	474(10.7)	422(23.9)
Sex assigned at birth	Male	2654(73.7)	949(26.3)	<0.01
Charlson Comorbidity Index	0	2237(78.6)	610(21.4)	<0.01
	1	931(72.3)	357(27.7)
	2	1276(61.4)	800(38.5)
Admission Specialty	Surgery	1149(73.8)	407(26.1)	<0.01
	Internal Medicine	2393(68.0)	1126(32.0)
	Other	902(79.4)	234(20.6)
Study interval	2015-2020	2362(69.1)	1056(30.9)	<0.01
	2020-2024	2082(74.5)	711(25.5)
Death within 24 hours	0	3114(66.2)	1587(33.8)	<0.01
	1	1330(88.1)	180(11.9)
