# Supplementary material for: Association Between Palliative Care in the Emergency Department and Cardiopulmonary Resuscitation Decisions in Patients with Poor Prognosis: A Retrospective Observational Study
Source: Research Square preprint supplement (doi:10.21203/rs.3.rs-6622782/v1), 2025-06-09
Supplement: Supplementary file 2 [file bf16ef71284e41969bdab2b4.docx]

**Supplementary Appendix 1 – Criteria for Classifying Cardiopulmonary Resuscitation (CPR) Attempts**

CPR attempts were identified using an automated natural language processing (NLP) model applied to electronic health records (EHRs), which included both structured and unstructured data fields. The classification was based on five predefined criteria, as described below:

**Criterion 1 – Differentiation of “PCR” as a clinical term**

Objective: Avoid false positives by distinguishing between “PCR” meaning cardiac arrest (in Portuguese) and unrelated uses (e.g., “PCR test” for COVID-19).

Excluded expressions (false positives):

- “rt-PCR”
- “PCR for COVID”
- “Request PCR”
- “Elevated PCR” / “Stable PCR”
- “Infectious disease surveillance”
- “+ PCR exam”
- “PCR+”

Classification: If only these terms were found, the case was not classified as cardiac arrest.

**Criterion 2 – Indicators of resuscitation attempt**

Objective: Identify textual evidence of CPR attempts.

Keywords and expressions searched in clinical notes:

“resuscitation attempt”

“CPR performed” / “cardiac massage”

“progressed to cardiac arrest”

“use of vasoactive drugs” (e.g., norepinephrine, vasopressin)

“use of amiodarone” / “adrenaline”

“intubation during cardiac arrest”

“resuscitation cycles”

Classification: Presence of any of these expressions led to classification as CPR attempt (1).

**Criterion 3 – ICD-10 codes related to cardiac arrest**

Objective: Use structured diagnostic codes to support CPR classification.

ICD-10 codes considered:

- I46.0 – Cardiac arrest with successful resuscitation
- I46.1 – Sudden cardiac death
- I46.9 – Cardiac arrest, unspecified

Classification: Presence of one or more of these codes contributed to positive classification, particularly when combined with Criterion 2.

**Criterion 4 – Death without evidence of CPR**

Objective: Identify patients who died without undergoing resuscitation attempts.

Classification rules:

- Death date equal to or after the recorded time of cardiac arrest.
- Absence of Criterion 2 terms.

Classification: If the above conditions were met, the case was classified as no CPR attempt (0).

**Criterion 5 – Documentation of palliative or non-resuscitative intent**

Objective: Detect medical notes explicitly indicating that CPR should not be performed.

Examples of expressions:

- “resuscitation not indicated”
- “conservative management”
- “do not resuscitate”
- “comfort measures only”

Classification: Presence of these expressions was interpreted as no CPR (0), even in the context of clinical deterioration or death.

**Final classification per patient**

Each patient was assigned a binary classification:

- 1 = CPR attempt identified
- 0 = No CPR attempt identified

For validation purposes, the dataset included:

- SEQ_ATENDIMENTO (anonymized encounter ID)
- Binary CPR outcome (0 or 1)
- Each of the five criteria (Criterion_1 to Criterion_5) coded as 0 (absent) or 1 (present)
- Text excerpts when applicable (e.g., notes containing trigger terms)
